# Supplementary material for: Characterizing temporal genomic heterogeneity in pediatric high-grade gliomas
Source: PubMed Central journal article supplement (PMC5663045; doi:10.1186/s40478-017-0479-8), 2017-10-30

**Supplementary Figure S1. IGV view of sequencing results from HGG3 primary (P) and recurrence (R) showing a subclonal mutation in *PIK3CA* H1047R**

HGG3\_P#1 original clinical sequencing sample

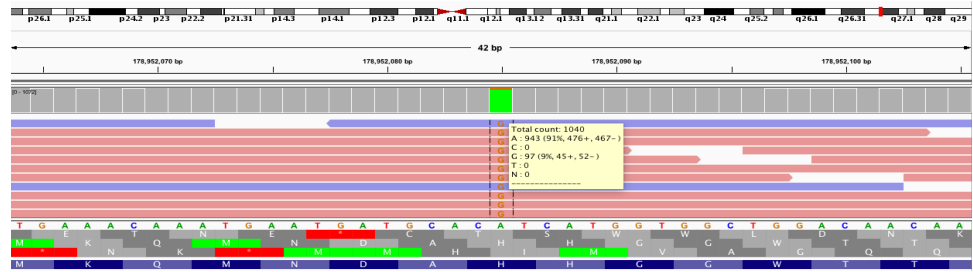

HGG3\_P#2 WES

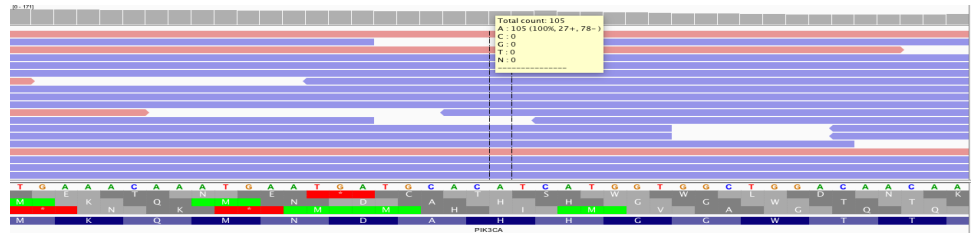

HGG3\_P#2 deep targeted sequencing

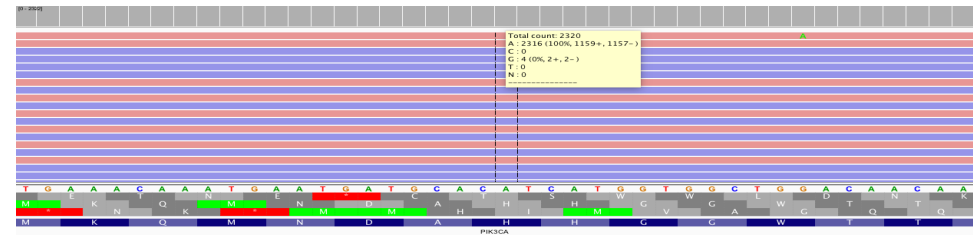

HGG3\_P#3 deep targeted sequencing

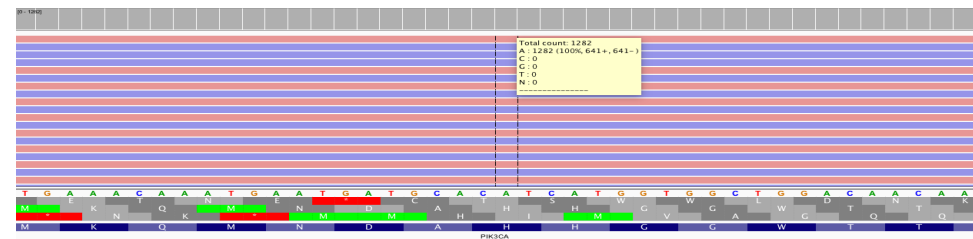

HGG3\_R#1 WES

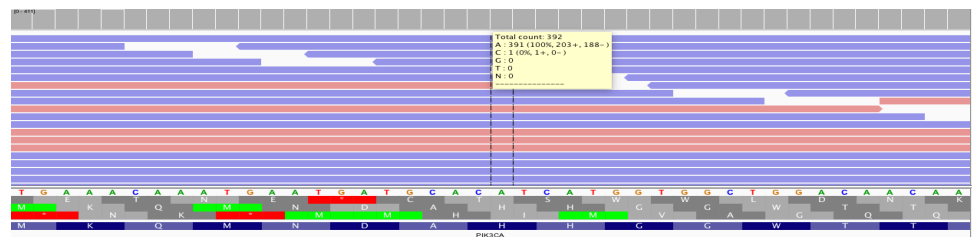

HGG3\_R#1 deep targeted sequencing

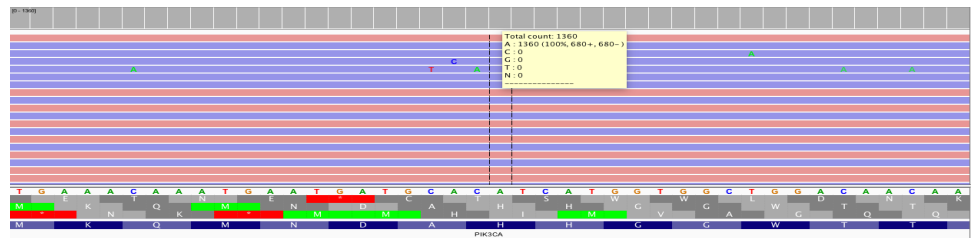

HGG3\_R#2 deep targeted sequencing

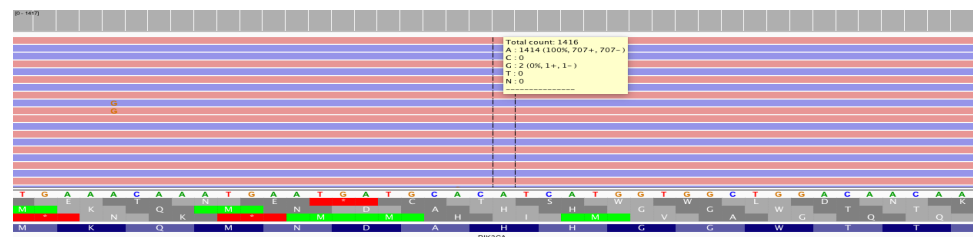

HGG3\_R#3 deep targeted sequencing

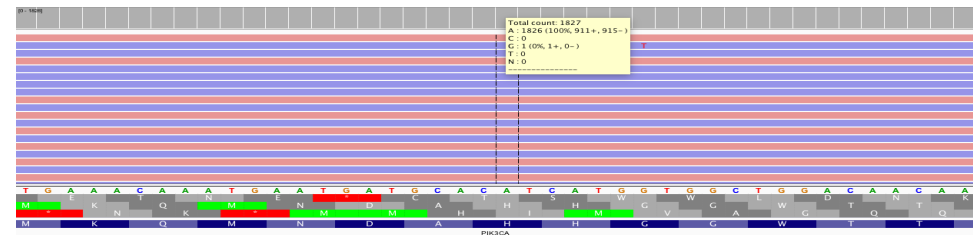

Supplement: 40478_2017_479_MOESM3_ESM.pdf [file 40478_2017_479_MOESM3_ESM.pdf]
