# Supplementary material for: Characterizing temporal genomic heterogeneity in pediatric high-grade gliomas
Source: PubMed Central journal article supplement (PMC5663045; doi:10.1186/s40478-017-0479-8), 2017-10-30
Supplement: 40478_2017_479_MOESM6_ESM.pdf [file 40478_2017_479_MOESM6_ESM.pdf]

**Supplementary Figure S3.** Immunohistochemical staining for the MMR panel (MLH1, MSH2, MSH6, PMS2) in the HGG11 primary tumor.

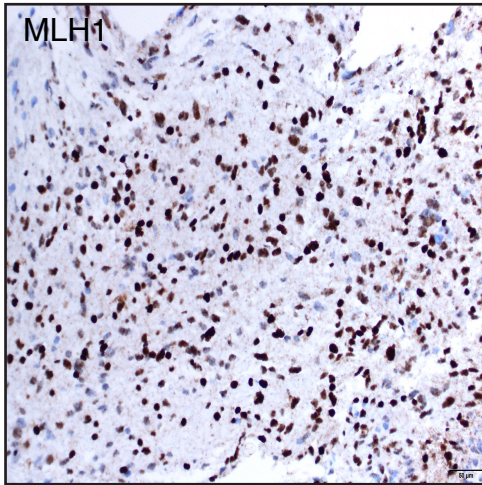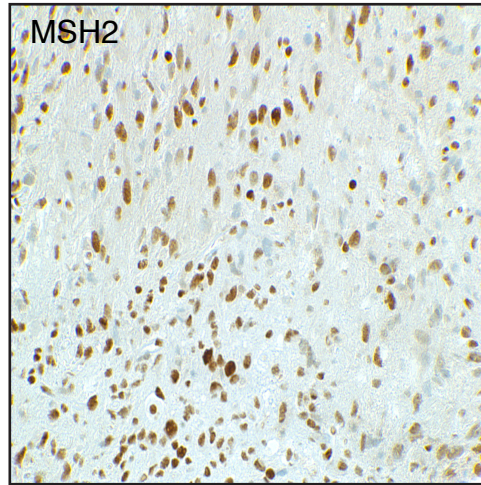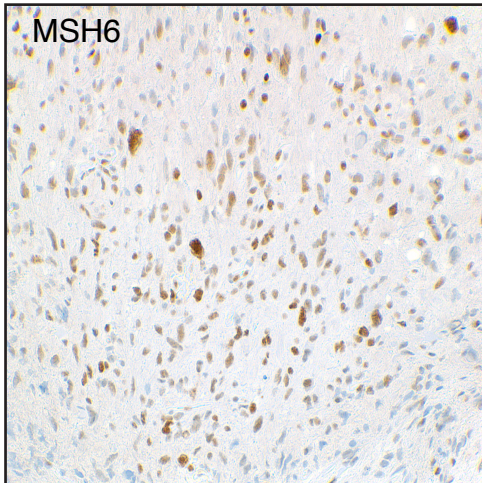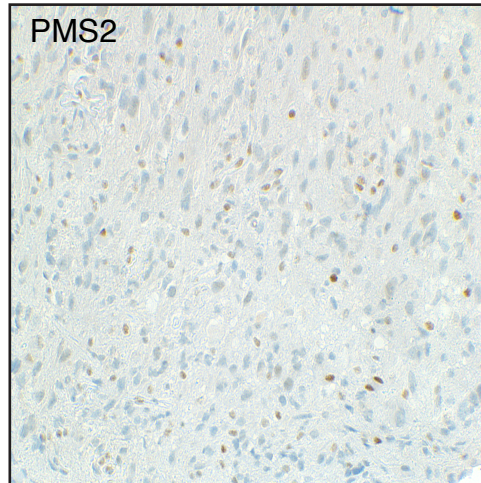

200X
