# Supplementary material for: Characterizing temporal genomic heterogeneity in pediatric high-grade gliomas
Source: Springer Nature journal article supplement (doi:10.1186/s40478-017-0479-8), 2017-10-30

**Supplementary Figure S2: Percentages of SNVs and regions of Allelic Imbalance as shared, primary only and recurrence only.**

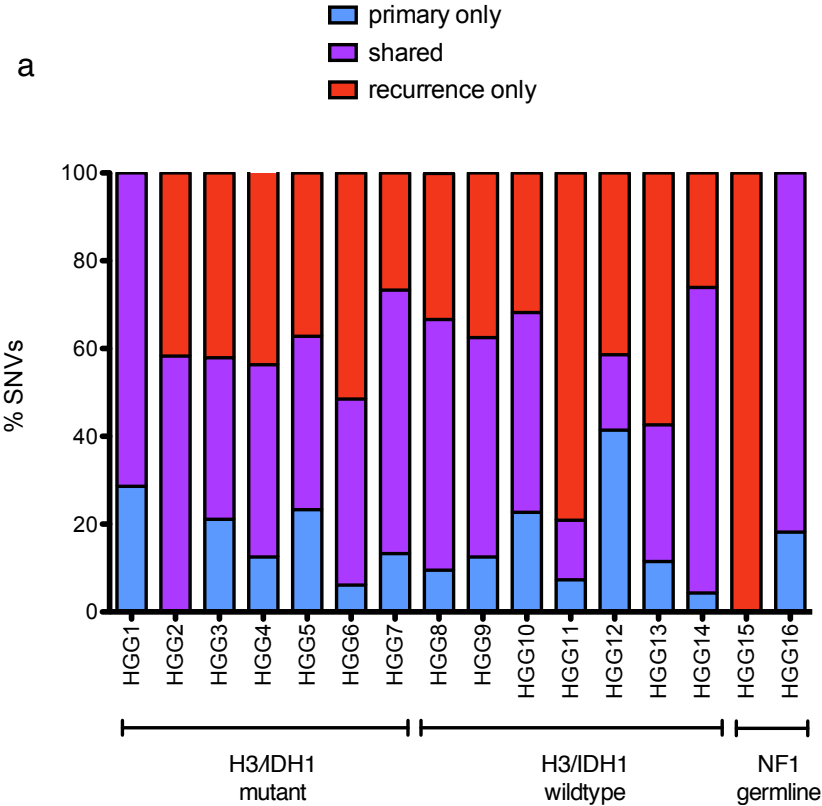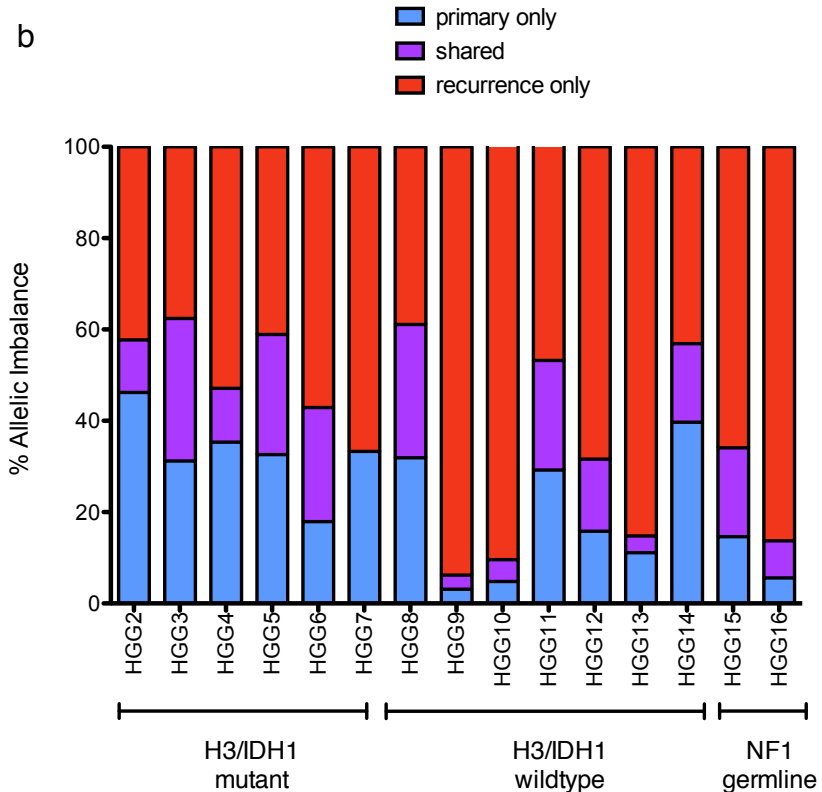

Supplement: MOESM5 [file 25666272]
