# Supplementary material for: Characterizing temporal genomic heterogeneity in pediatric high-grade gliomas
Source: Springer Nature journal article supplement (doi:10.1186/s40478-017-0479-8), 2017-10-30

**Supplementary Figure S4.** Genome-wide view of copy number variations in HGG9 primary and recurrence tumors calculated from Whole Exome Sequencing data

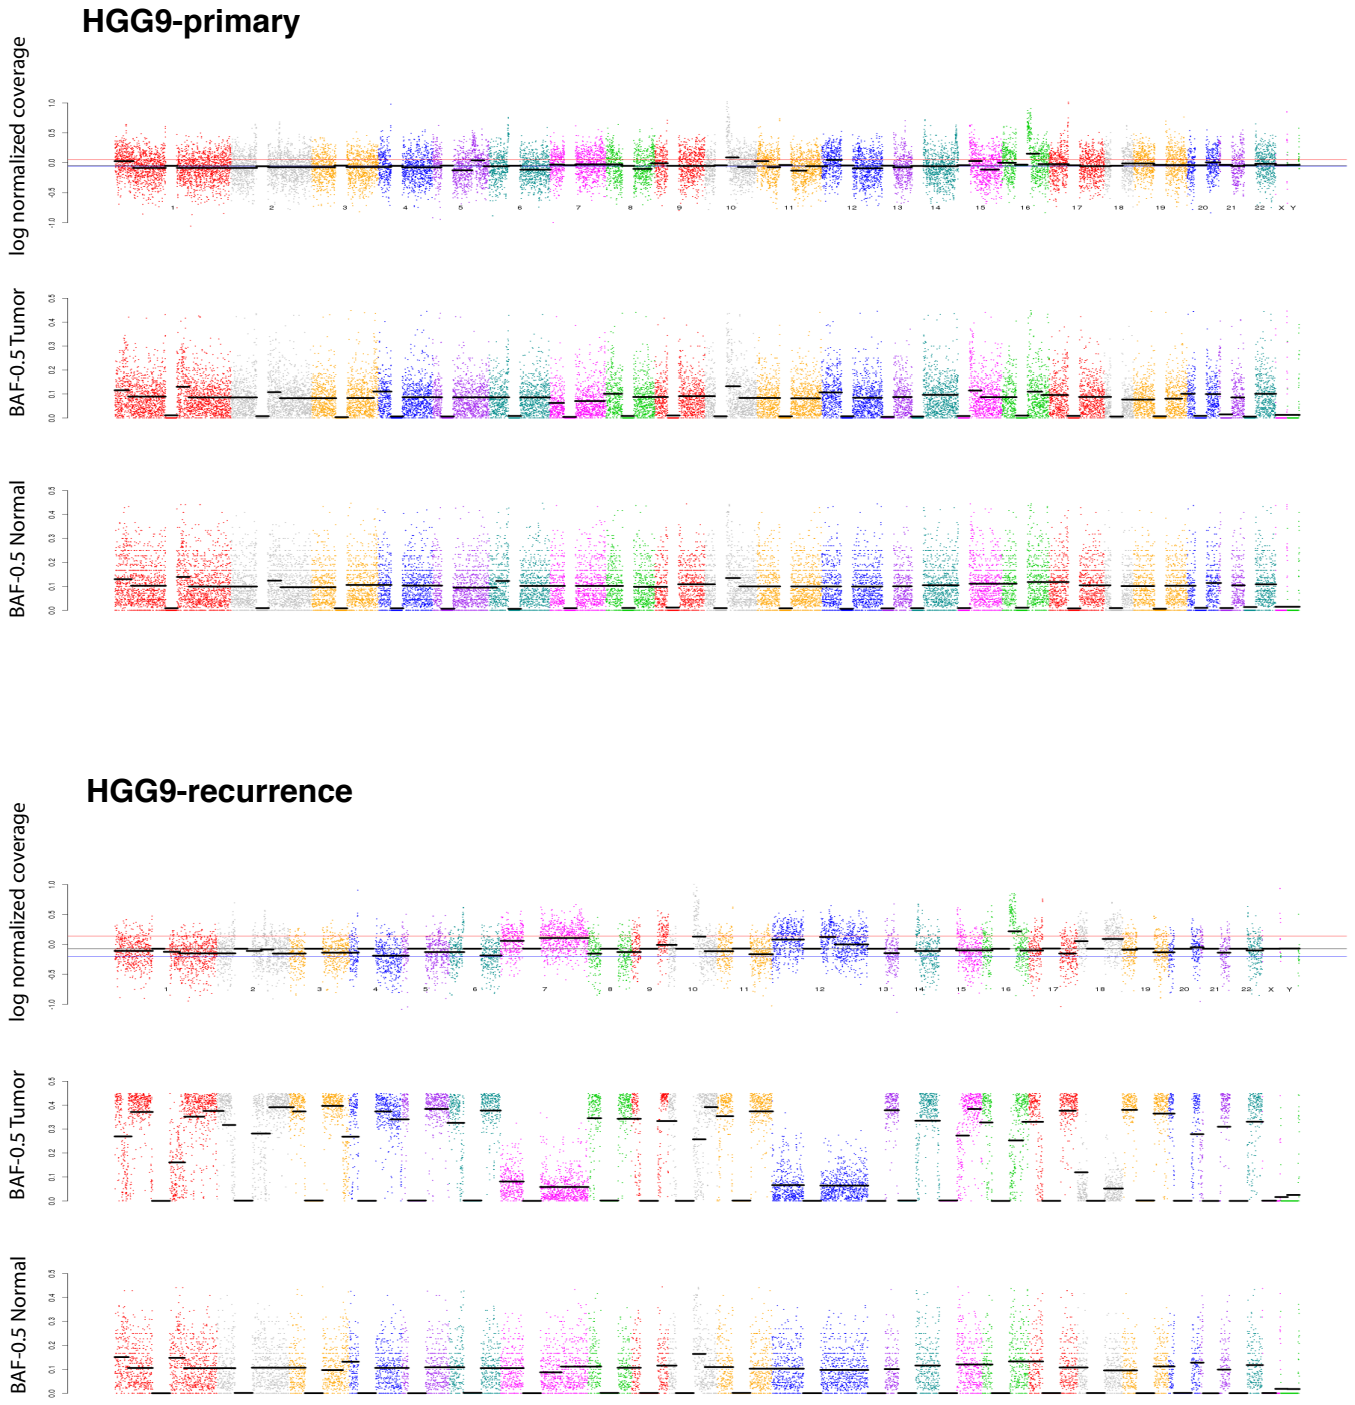

Supplement: MOESM7 [file 25666272]
